# Supplementary material for: Influenza Virus Drug Resistance: A Time-Sampled Population Genetics Perspective
Source: PLOS journal article supplement (doi:10.1371/journal.pgen.1004185), 2014-02-27

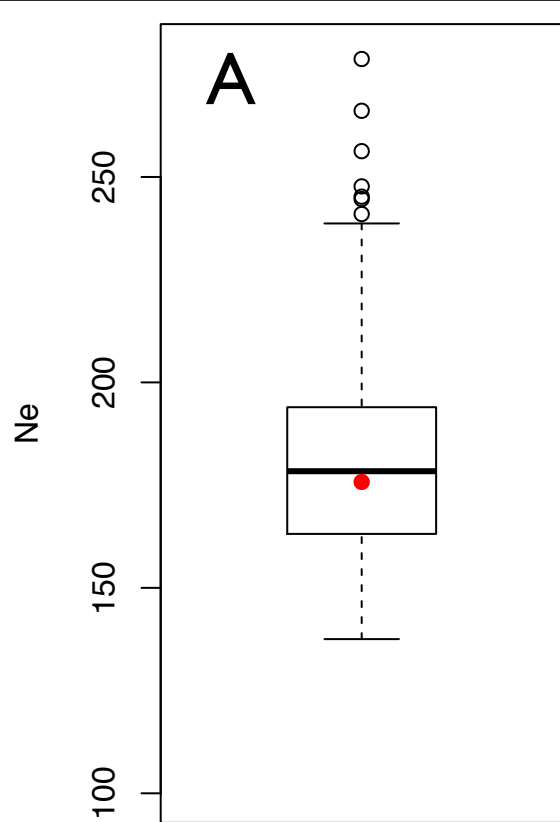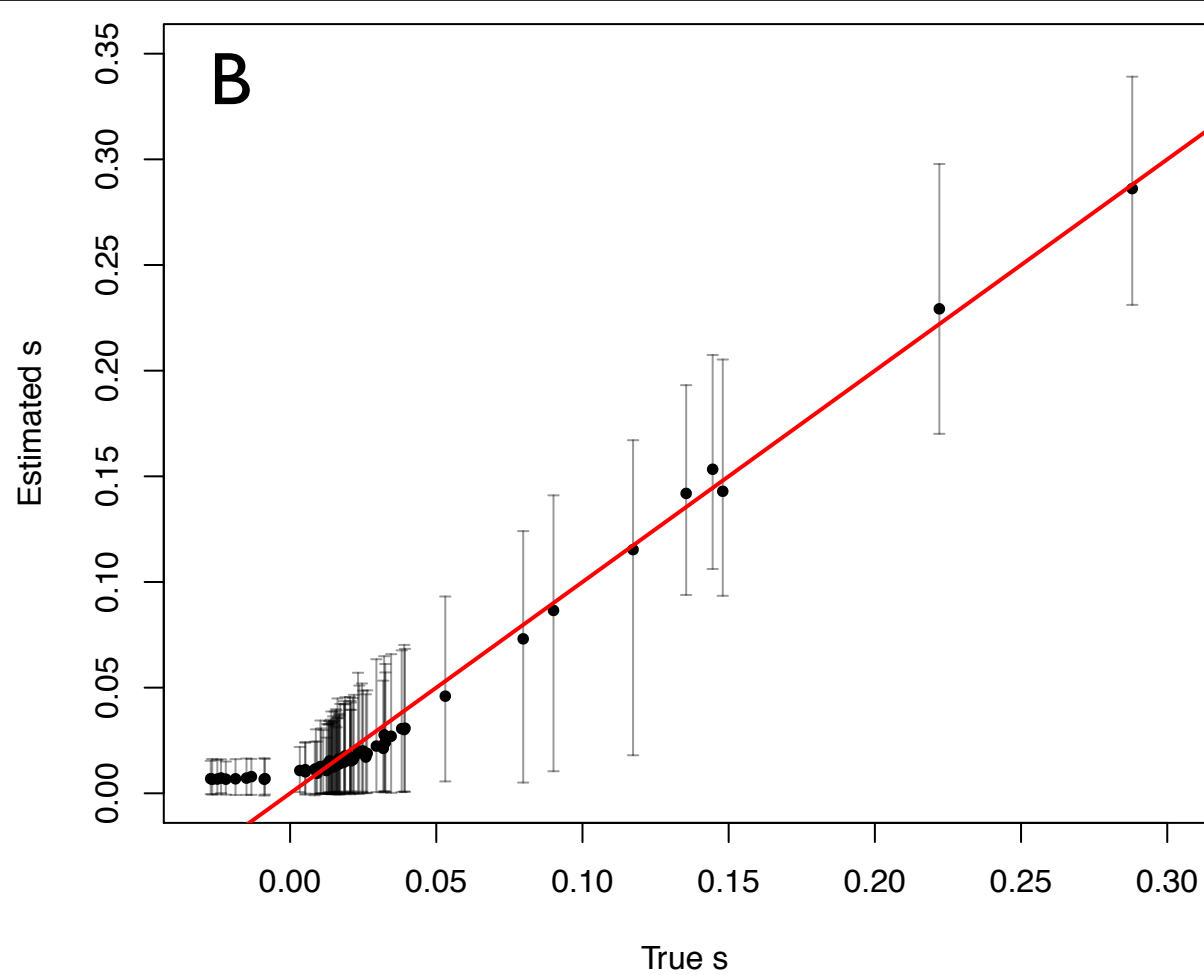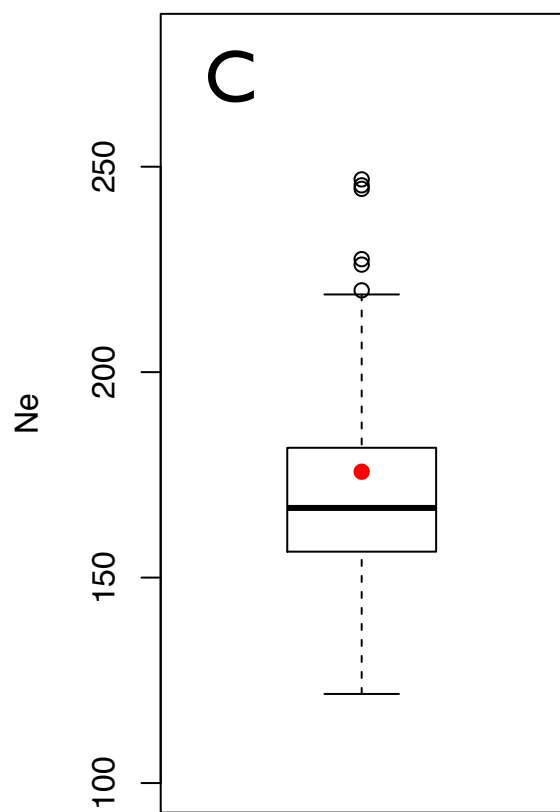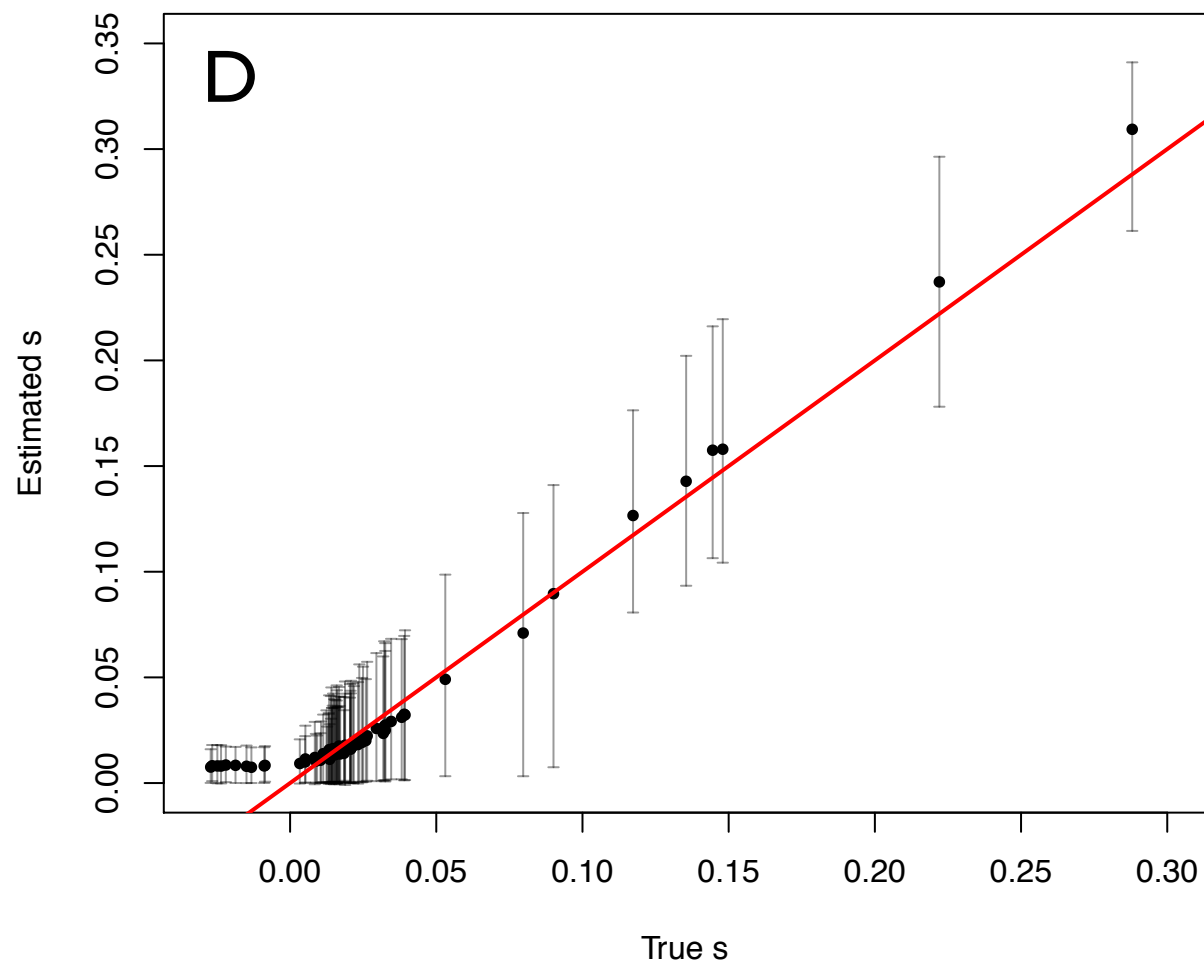

Supplement: S5 (10.1371/journal.pgen.1004185.s005) [file journal.pgen.1004185.s005]
